# Supplementary material for: Controlled growth of single-crystalline nanostructured dendrites of α-Fe2O3 blended with MWCNT: a systematic investigation of highly selective determination of l-dopa
Source: Royal Society of Chemistry journal article supplement (doi:10.1039/c4ra01451k), 2014-01-01
Supplement: c4ra01451k1.pdf [file c4ra01451k1.pdf]

### Supplementary Information

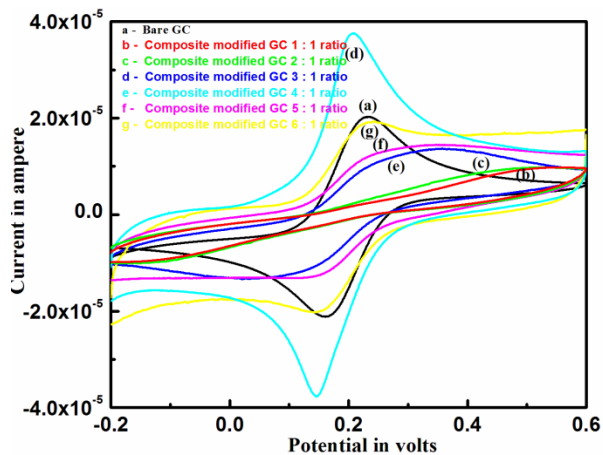

Fig.S1 CV performance of  $\text{Fe}_2\text{O}_3$  and CNT with different ratio in 0.1 M of KCl in 1mM of  $[\text{Fe}(\text{CN})_6]^{-3/-4}$

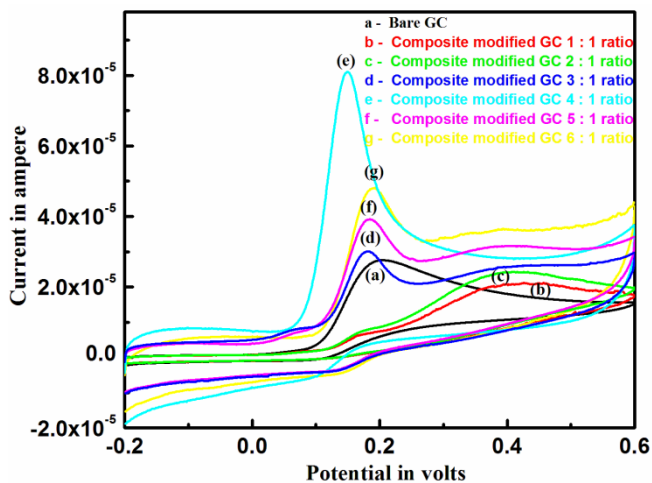

Fig. S2 CV performance of  $\text{Fe}_2\text{O}_3$  and CNT with different ratio in 1mM of L – Dopa solution in PBS (pH 7.2)

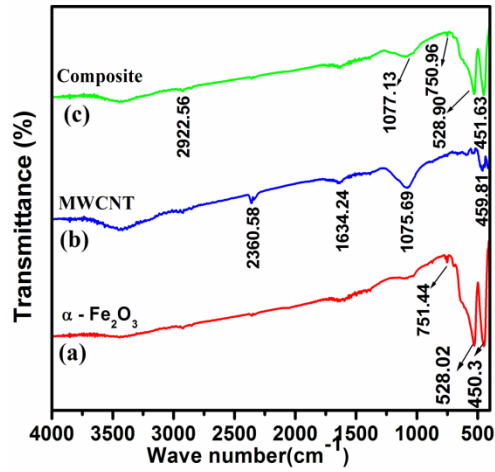

Fig.S3 FTIR analysis: curve (a)  $\alpha$ -Fe<sub>2</sub>O<sub>3</sub> (b) MWCNT (c) MWCNT decorated  $\alpha$ -Fe<sub>2</sub>O<sub>3</sub>

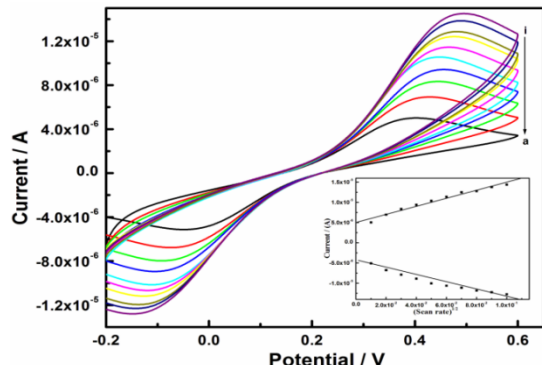

(a)

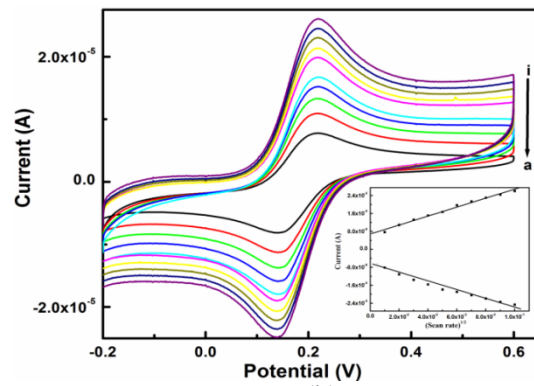

(b)

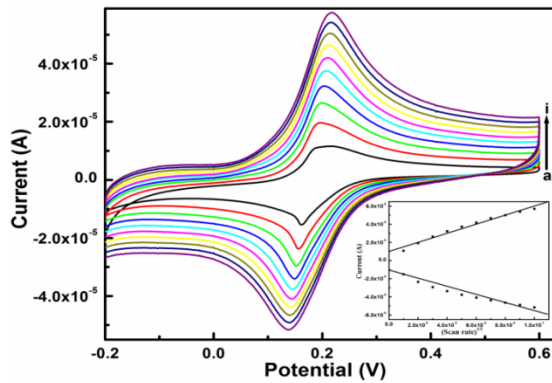

(c)

**Fig.S4** Cyclic voltammogram recorded at 10–100 mV s<sup>-1</sup> for (a)  $\alpha$ -Fe<sub>2</sub>O<sub>3</sub> (b) MWCNT, (c)  $\alpha$ -Fe<sub>2</sub>O<sub>3</sub> and MWCNT composite modified electrodes in PBS. (10 mM; pH 7.2) containing [Fe(CN)<sub>6</sub>]<sup>3-/4-</sup> (1 mM). Inset: plots of peak current versus square root of scan rate.

Sup. Table-1

**Real sample analysis of l-dopa in commercial tablets**

| Samples | Labeled (mg) | Found(mg) | Recovery % |
|---------|--------------|-----------|------------|
| 1       | 200          | 216       | 108        |
| 2       | 200          | 217       | 108.5      |
